# Supplementary material for: Perceptions of Adolescents With Cancer Related to a Pain Management App and Its Evaluation: Qualitative Study Nested Within a Multicenter Pilot Feasibility Study
Source: PubMed Central journal article supplement (PMC5910537; doi:10.2196/mhealth.9319), 2018-04-06

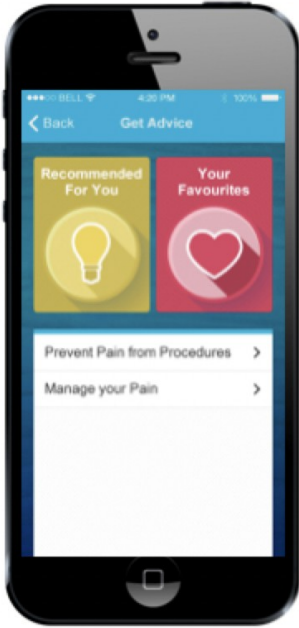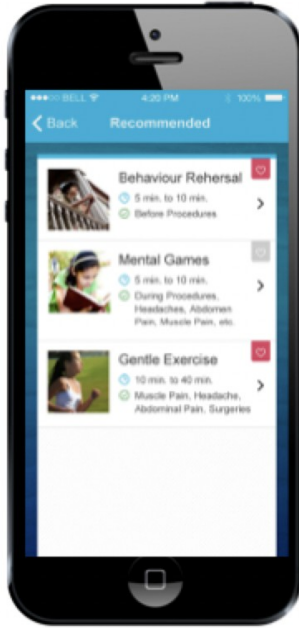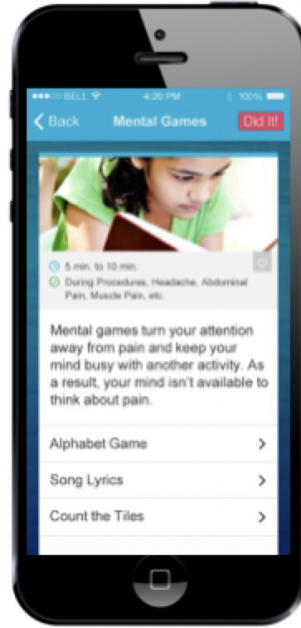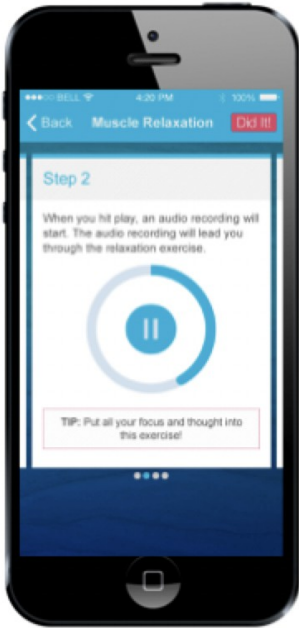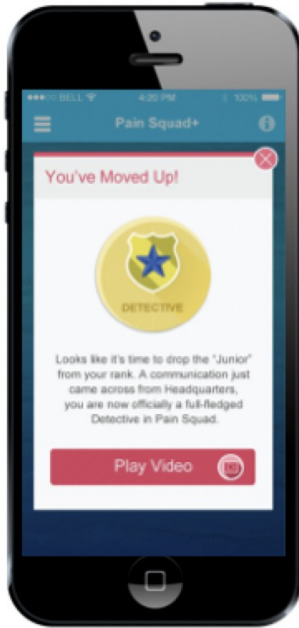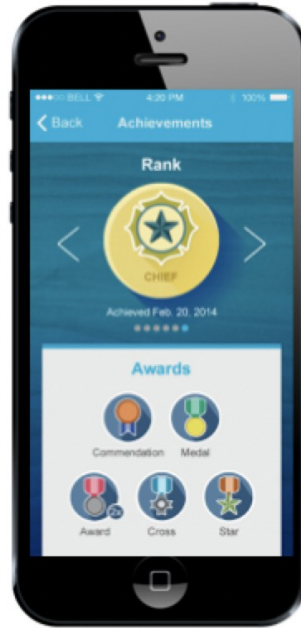

Supplement: mhealth_v6i4e80_app1.pdf [file mhealth_v6i4e80_app1.pdf]
