# Supplementary material for: Perceptions of Adolescents With Cancer Related to a Pain Management App and Its Evaluation: Qualitative Study Nested Within a Multicenter Pilot Feasibility Study
Source: PubMed Central journal article supplement (PMC5910537; doi:10.2196/mhealth.9319), 2018-04-06
Supplement: mhealth_v6i4e80_app2.pdf [file mhealth_v6i4e80_app2.pdf]

| <b>Item</b>                                    | <b>Response</b>                                                                                                                                                                                                                                                                                           |
|------------------------------------------------|-----------------------------------------------------------------------------------------------------------------------------------------------------------------------------------------------------------------------------------------------------------------------------------------------------------|
| <b>Domain 1: Research team and reflexivity</b> |                                                                                                                                                                                                                                                                                                           |
| <b><i>Personal characteristics</i></b>         |                                                                                                                                                                                                                                                                                                           |
| 1. Interviewer /facilitator                    | The first author conducted all interviews                                                                                                                                                                                                                                                                 |
| 2. Credentials                                 | Masters-level investigator from the field of nursing with previous experience in qualitative research                                                                                                                                                                                                     |
| 3. Occupation                                  | The research team had representation from nursing, medicine, and engineering. Team member have expertise in pediatric oncology, pediatric pain, and mHealth development and testing.                                                                                                                      |
| 4. Sex                                         | The research team had both male and female representation.                                                                                                                                                                                                                                                |
| 5. Experience and training                     | The interviewer completed doctoral-level coursework in qualitative methodologies and methods and holds NVivo software certification. She had previously conducted numerous interviews with adolescents with cancer.                                                                                       |
| <b><i>Relationship with participants</i></b>   |                                                                                                                                                                                                                                                                                                           |
| 6. Relationship established                    | The interviewer knew most of the adolescents prior to the interviews as she provided nursing care to them.                                                                                                                                                                                                |
| 7. Participant knowledge of interviewer        | All adolescents knew that this study was part of the interviewer's PhD research.                                                                                                                                                                                                                          |
| 8. Interviewer characteristics                 | All adolescents knew that the interviewer's primary goal was to understand their impressions of the intervention and study in order to make improvements in preparation for a larger study.                                                                                                               |
| <b>Domain 2: Study design</b>                  |                                                                                                                                                                                                                                                                                                           |
| <b><i>Theoretical framework</i></b>            |                                                                                                                                                                                                                                                                                                           |
| 9. Methodological orientation and theory       | A content analysis approach was used.                                                                                                                                                                                                                                                                     |
| <b><i>Participant selection</i></b>            |                                                                                                                                                                                                                                                                                                           |
| 10. Sampling                                   | A purposive maximum variation sampling strategy was used. Specifically, adolescents who varied in terms of age, sex, diagnosis, perceived Pain Squad+ acceptability and adherence, as well as baseline to post-study change scores on health-related study outcome measures were selected to participate. |
| 11. Method of approach                         | The interviewer called adolescents who agreed to participate in interviews on the telephone.                                                                                                                                                                                                              |
| 12. Sample size                                | 20                                                                                                                                                                                                                                                                                                        |
| 13. Non-participation                          | Most participants from the pilot study (n=30; 91%) agreed in advance to participate in interviews. The interviewer contacted 20 of these adolescents and all participated in interviews.                                                                                                                  |
| <b><i>Setting</i></b>                          |                                                                                                                                                                                                                                                                                                           |

|                                        |                                                                                                                                                                                                                                                                                                            |
|----------------------------------------|------------------------------------------------------------------------------------------------------------------------------------------------------------------------------------------------------------------------------------------------------------------------------------------------------------|
| 14. Setting of data collection         | The interviewer was in her office and adolescents were either at home or in the hospital during the telephone interviews.                                                                                                                                                                                  |
| 15. Presence of non-participants       | The interviewer was alone during the interview. Adolescents could be in the presence of others during the interview, although were usually alone.                                                                                                                                                          |
| 16. Description of sample              | Adolescent characteristics are presented in Table 2.                                                                                                                                                                                                                                                       |
| <b>Data collection</b>                 |                                                                                                                                                                                                                                                                                                            |
| 17. Interview guide                    | An interview guide that was based on one previously used successfully with adolescents with cancer [33] was used. The guide was piloted for ease of understanding with 3 adolescents who met the inclusion criteria before formal testing. No modifications to the guide were required following piloting. |
| 18. Repeat interviews                  | Repeat interviews were not conducted.                                                                                                                                                                                                                                                                      |
| 19. Audio-visual recording             | Interviews were audio-recorded.                                                                                                                                                                                                                                                                            |
| 20. Field notes                        | Field notes were made after the interviews.                                                                                                                                                                                                                                                                |
| 21. Duration                           | Interview length ranged from 7 to 20 minutes (M=11; SD=3).                                                                                                                                                                                                                                                 |
| 22. Data saturation                    | Data saturation was considered to have been achieved when new interview data collected were redundant with those previously categorized (ie, after 20 interviews [27])                                                                                                                                     |
| 23. Transcripts returned               | Transcripts were not returned to adolescents but were verified against audio-recordings for accuracy.                                                                                                                                                                                                      |
| <b>Domain 3: Analysis and findings</b> |                                                                                                                                                                                                                                                                                                            |
| <b>Data analysis</b>                   |                                                                                                                                                                                                                                                                                                            |
| 24. Number of data coders              | Two study team members coded data (LJ and VH)                                                                                                                                                                                                                                                              |
| 25. Description of coding tree         | Initial codes were developed based on the study objectives, but codes were continually refined as simultaneous data collection and analyses were conducted. Table 3 shows the final set of data codes.                                                                                                     |
| 26. Derivation of themes               | Codes were grouped into meaningful categories based on the relationships between codes. Categories continued to be generated until all study data were classified under the existing categories [26,37,38]. Categories were grouped into themes.                                                           |
| 27. Software                           | The transcribed data were managed using NVivo 10.0 software [36] to code and annotate text.                                                                                                                                                                                                                |
| 28. Participant checking               | Participants did not provide feedback on study results.                                                                                                                                                                                                                                                    |
| <b>Reporting</b>                       |                                                                                                                                                                                                                                                                                                            |
| 29. Quotations presented               | Participant quotations are presented with an associated participant sex and age.                                                                                                                                                                                                                           |
| 30. Data and findings consistent       | The quotations presented exemplify the findings, which are consistent with the extant literature.                                                                                                                                                                                                          |
| 31. Clarity of major                   | Major themes are presented in Table 3 and body of the text.                                                                                                                                                                                                                                                |

|                             |                                                                               |
|-----------------------------|-------------------------------------------------------------------------------|
| themes                      |                                                                               |
| 32. Clarity of minor themes | Minor themes and diverse cases are presented in Table 3 and body of the text. |
