# Supplementary material for: Perceptions of Adolescents With Cancer Related to a Pain Management App and Its Evaluation: Qualitative Study Nested Within a Multicenter Pilot Feasibility Study
Source: PubMed Central journal article supplement (PMC5910537; doi:10.2196/mhealth.9319), 2018-04-06
Supplement: mhealth_v6i4e80_app3.pdf [file mhealth_v6i4e80_app3.pdf]

| Age (years) | Sex | Cancer diagnosis | AES score | Adherence (%) <sup>a</sup> | Outcome measure scores |           |               |           |            |           |                    |           |
|-------------|-----|------------------|-----------|----------------------------|------------------------|-----------|---------------|-----------|------------|-----------|--------------------|-----------|
|             |     |                  |           |                            | BPI                    |           | PROMIS PPI-SF |           | PedsQL 4.0 |           | Pain self-efficacy |           |
|             |     |                  |           |                            | Baseline               | Poststudy | Baseline      | Poststudy | Baseline   | Poststudy | Baseline           | Poststudy |
| 15          | F   | ALL              | 22        | 28.5                       | 4.0                    | 3.8       | 64.4          | 65.4      | 52.2       | 53.3      | 2                  | 1         |
| 12          | M   | ALL              | 23        | 83.9                       | 5.8                    | 2.8       | 63.4          | 63.4      | 59.7       | 67.4      | missing            | missing   |
| 16          | F   | Ovarian          | 23        | 108.9                      | 5.5                    | 6.5       | 65.4          | 67.6      | 36.8       | 41.5      | missing            | missing   |
| 13          | M   | LCH              | missing   | withdrew                   | missing                | missing   | missing       | missing   | missing    | missing   | missing            | missing   |
| 14          | M   | ALL              | 24        | 58.9                       | 7.8                    | 3.3       | 75.0          | 61.4      | 26.0       | 43.5      | 3                  | 3         |
| 14          | M   | Colon            | 27        | 37.5                       | 0.8                    | 0         | 65.4          | 34.0      | 33.7       | 75.0      | missing            | 5         |
| 16          | M   | Lymphoma         | 29        | 71.4                       |                        | 1         |               | 6.3       |            | -12.0     | 3                  | 5         |
| 14          | F   | Lymphoma         | 25        | 92.9                       | 2.3                    | 1.3       | 50.6          | 44.3      | 75.0       | 87.0      |                    | 0         |
| 12          | M   | ALL              | 28        | 51.8                       | 2.3                    | 3.8       | 59.5          | 64.4      | 55.4       | 45.7      | 5                  | 5         |
| 16          | F   | AML              | 25        | 155.3                      | 3.8                    | 2.2       | 66.5          | 64.4      | 44.4       | 31.9      | 3                  | 3         |
| 14          | M   | ALL              | 24        | 83.9                       | 3.3                    | 4.8       | 68.8          | 62.4      | 27.2       | 34.8      | 3                  | 3         |
| 15          | M   | Lung             | 23        | 180.4                      | 3.3                    | 0         | 50.6          | 40.6      | 71.0       | 97.2      | 5                  | 5         |
| 14          | F   | ALL              | 21        | 42.9                       | 2.5                    | 0         | 62.4          | 34.0      | 34.7       | 61.1      | 5                  | 5         |
| 14          | M   | Lymphoma         | 24        | 58.9                       | 2.8                    | 1.0       | 54.7          | 50.6      | 73.6       | 73.9      | 3                  | 3         |
| 14          | F   | Ewing sarcoma    | 25        | 21.4                       | 2.3                    | 0.5       | 42.7          | missing   | 75.0       | 79.2      | 5                  | 5         |
| 13          | F   | Colon            | 28        | 135.7                      | 3.8                    | 4.3       | 60.4          | 62.4      | 42.4       | 44.6      | 5                  | 5         |
| 17          | F   | Lymphoma         | missing   | 58.9                       | 2.8                    | missing   | 61.4          | missing   | 52.8       | missing   | 3                  | missing   |

|                    |   |                 |             |      |     |             |      |             |      |              |   |            |
|--------------------|---|-----------------|-------------|------|-----|-------------|------|-------------|------|--------------|---|------------|
| 16                 | M | Germ cell tumor | missing     | 16.6 | 4.5 | 2.8         | 34.0 | 40.6        | 82.6 | 81.5         | 3 | 3          |
| 12                 | F | ALL             | 26          | 60.7 | 3   | 2.5         | 53.7 | 73.2        | 62.0 | 59.8         | 2 | 3          |
| 17                 | M | Lymphoma        | 22          | 67.9 | 3.3 | 0           | 60.4 | 34.0        | 47.2 | 64.1         | 3 | 3          |
| <i>Scale range</i> |   |                 | <i>6-30</i> |      |     | <i>0-10</i> |      | <i>3-83</i> |      | <i>0-100</i> |   | <i>1-5</i> |

<sup>a</sup> Percent of requested reports completed. Could be greater than 100% as some participants continued to complete pain reports on the app after the study had completed. Notes.

AES = Acceptability E-Scale. ALL = Acute lymphoblastic leukemia. AML = Acute myeloid leukemia. BPI = Brief Pain Inventory. LCH = Langerhans cell histiocytosis. PedsQL

4.0 = Pediatric Quality of Life Inventory 4.0. PROMIS PPI-SF = Patient Reported Outcomes Measurement Information System Pediatric Pain Interference Scale Short Form.
